# Supplementary material for: Genomic Relationships and Speciation Times of Human, Chimpanzee, and Gorilla Inferred from a Coalescent Hidden Markov Model
Source: PubMed Central journal article supplement (PMC1802818; doi:10.1371/journal.pgen.0030007), 2007-02-23

Figure S1: Analysis of 1255 kb from target1

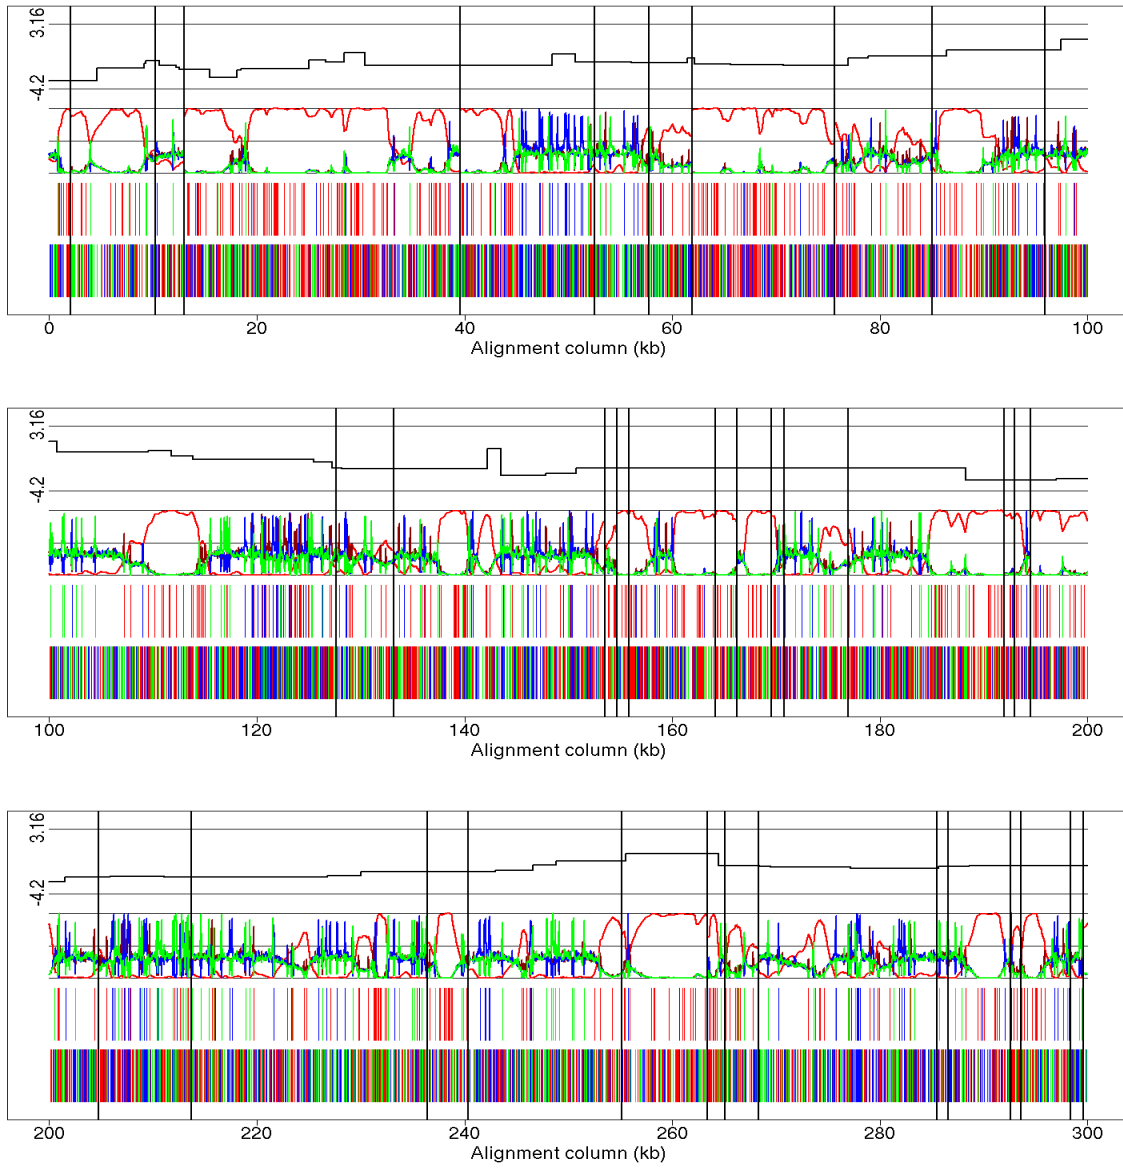

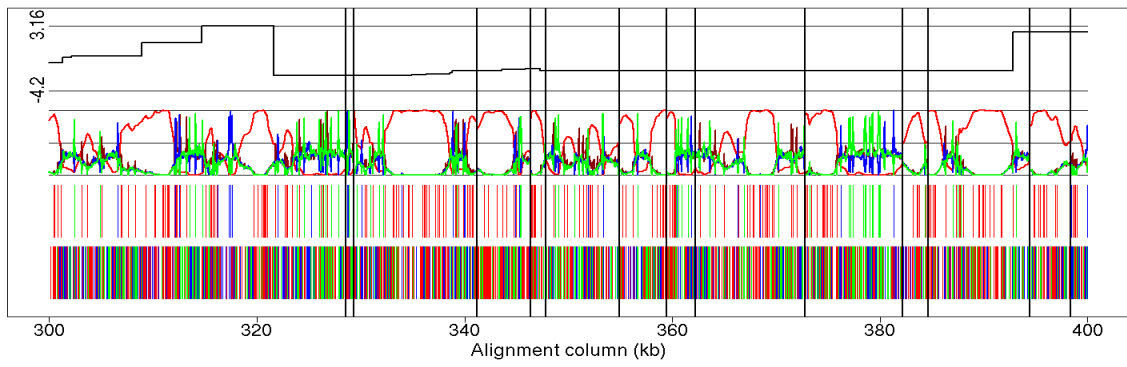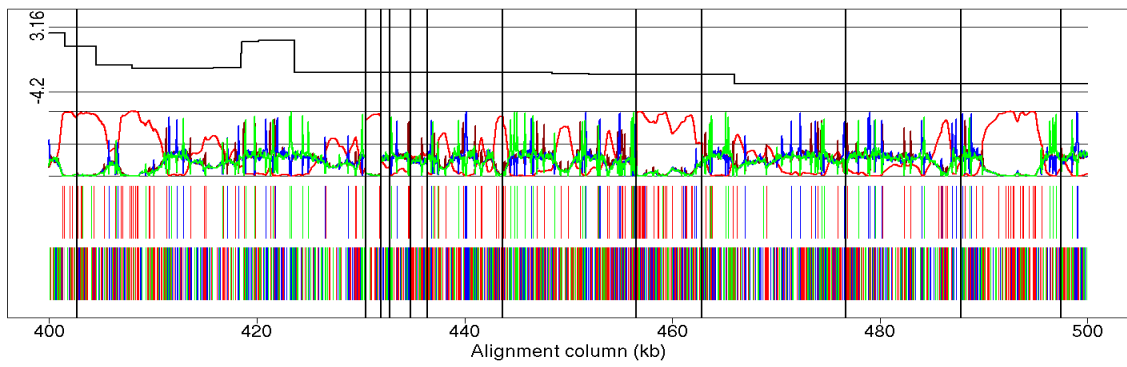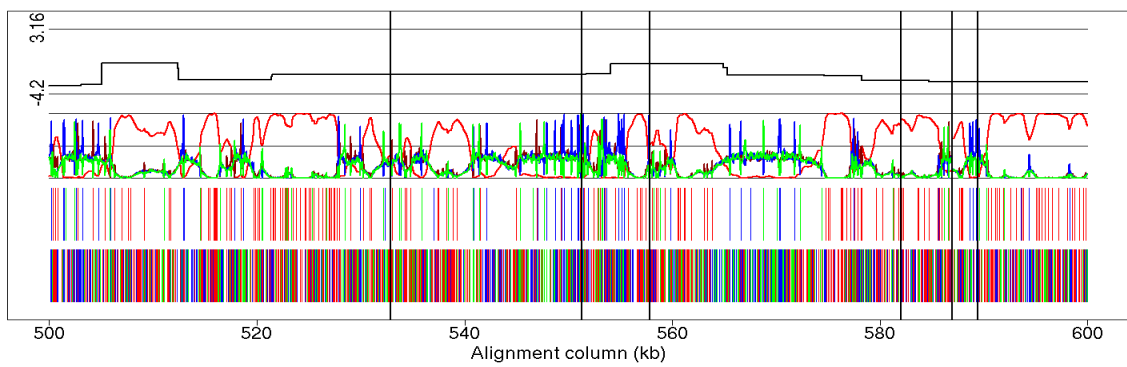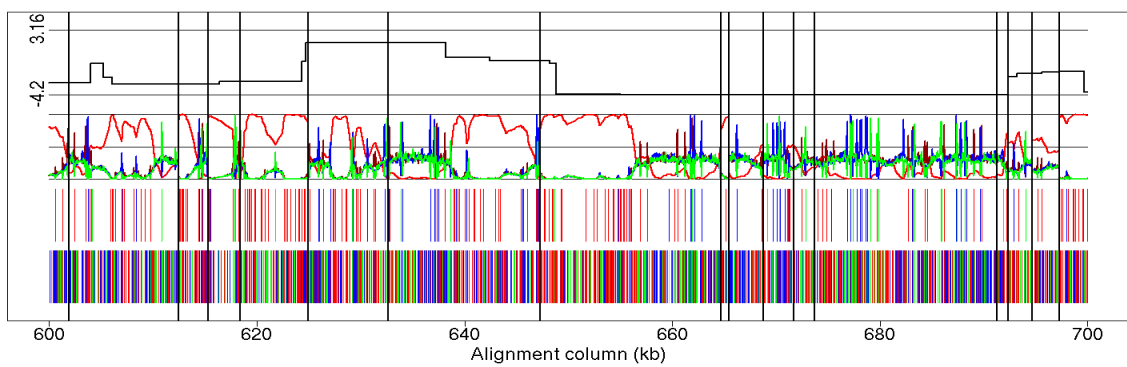

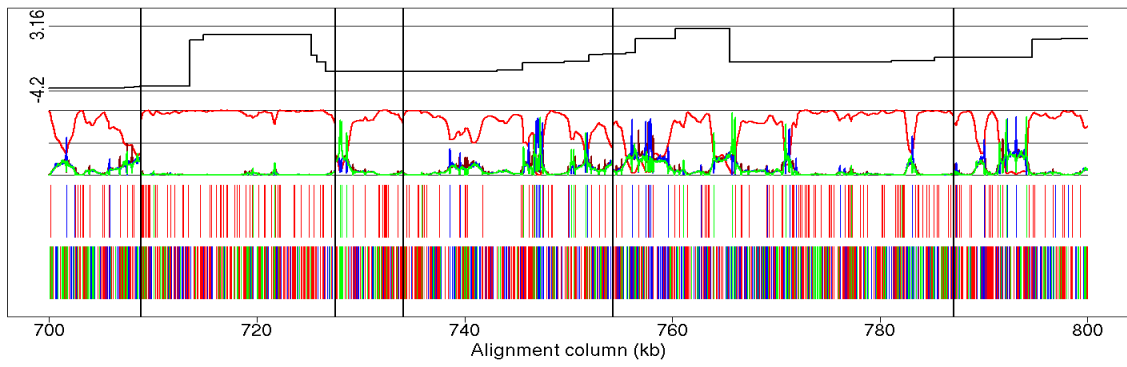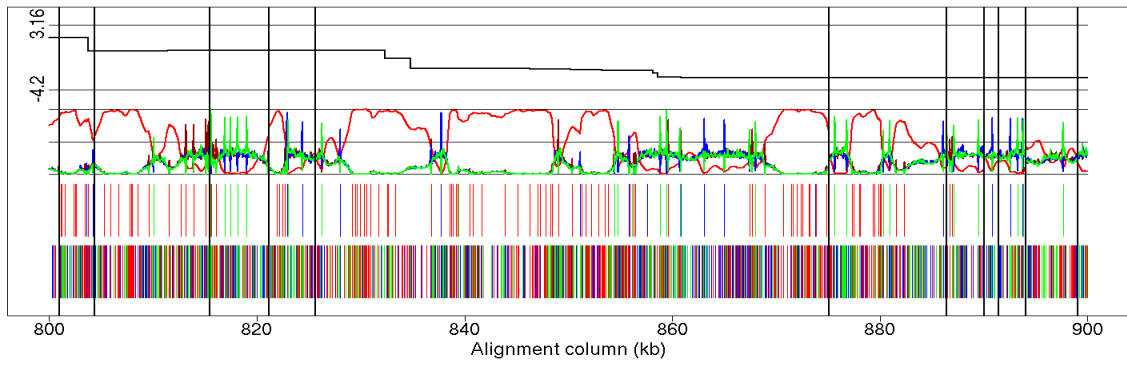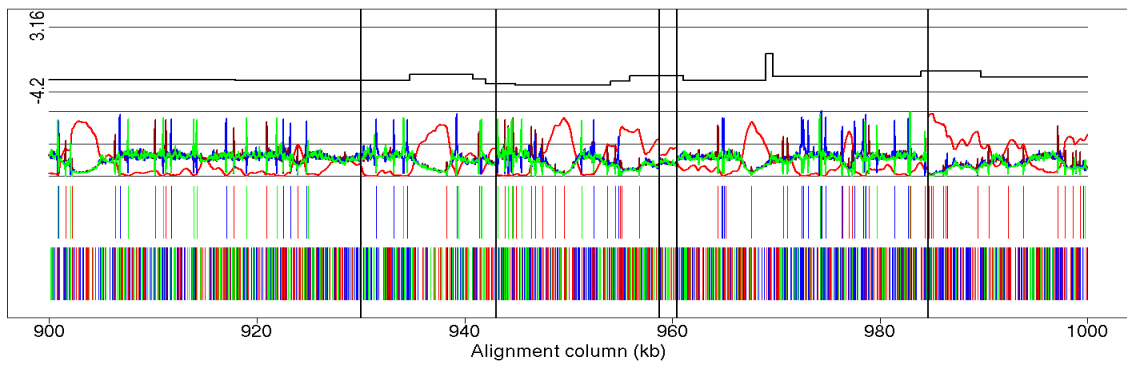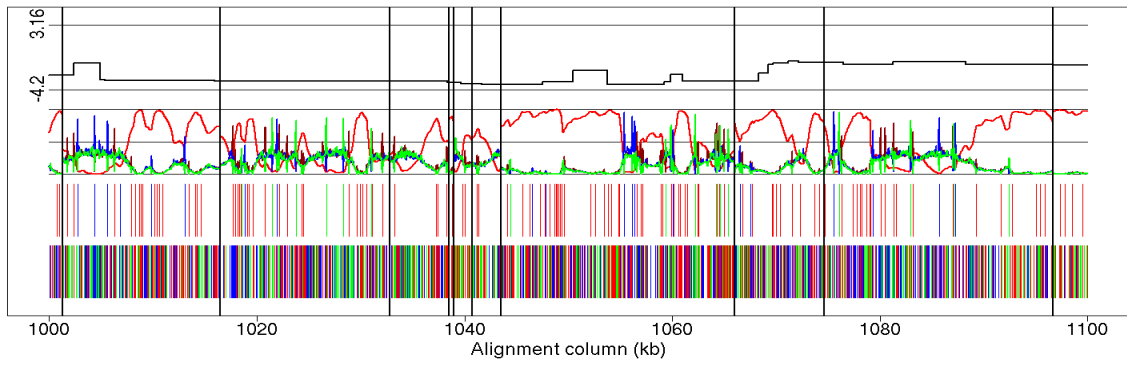

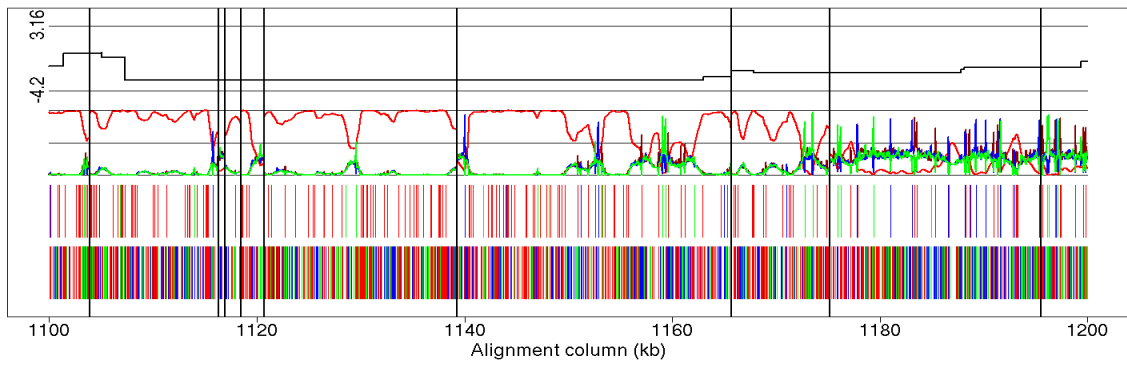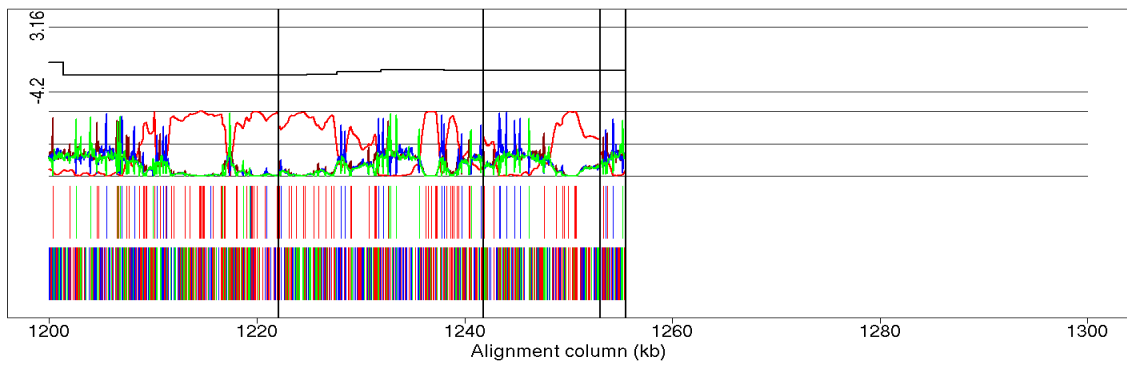

Supplement: pgen.0030007.sg001.pdf [file pgen.0030007.sg001.pdf]
