# Supplementary material for: Genomic Relationships and Speciation Times of Human, Chimpanzee, and Gorilla Inferred from a Coalescent Hidden Markov Model
Source: PubMed Central journal article supplement (PMC1802818; doi:10.1371/journal.pgen.0030007), 2007-02-23

Figure S2: Analysis of 258 kb from target106

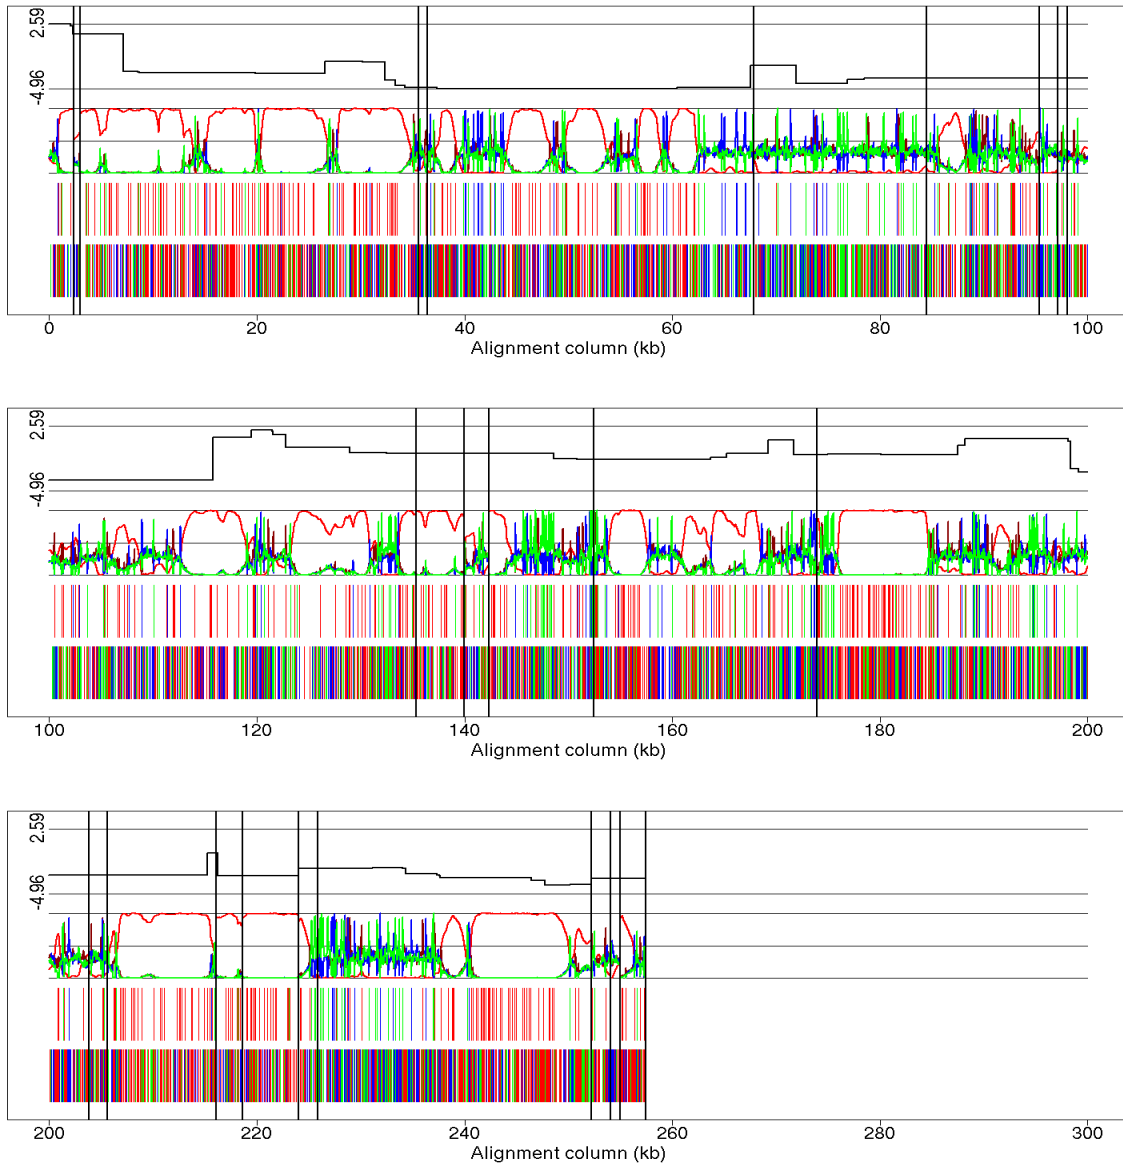

Supplement: pgen.0030007.sg002.pdf [file pgen.0030007.sg002.pdf]
